# Supplementary material for: Campylobacter jejuni promotes colorectal tumorigenesis through the action of cytolethal distending toxin
Source: PubMed Central journal article supplement — Gut. 2018 Oct 30;68(2):289–300. doi: 10.1136/gutjnl-2018-317200 (PMC6352414; doi:10.1136/gutjnl-2018-317200), 2018-10-30

**Supplemental Figure 1**

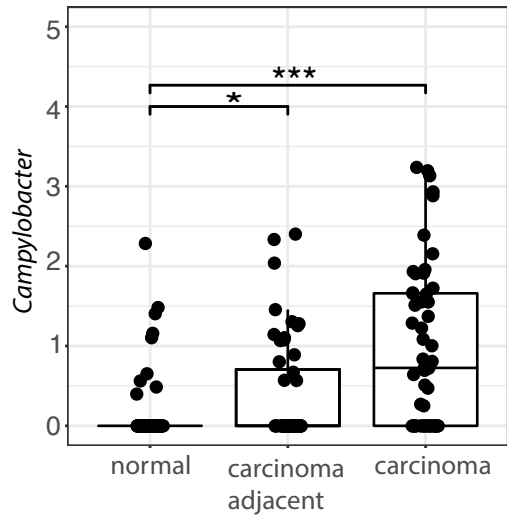

## Supplemental Figure 2

**A**

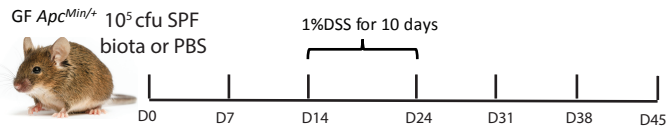

**B**

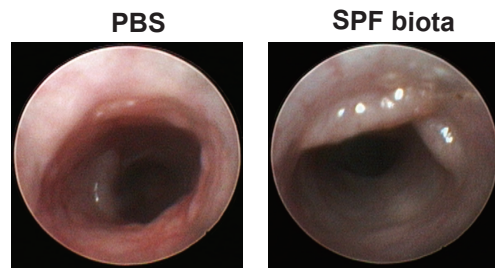

**C**

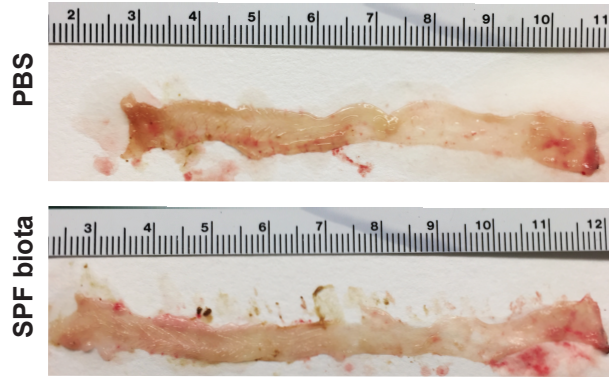

**D**

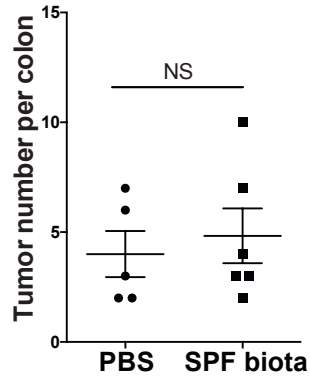

Supplemental Figure 3

A

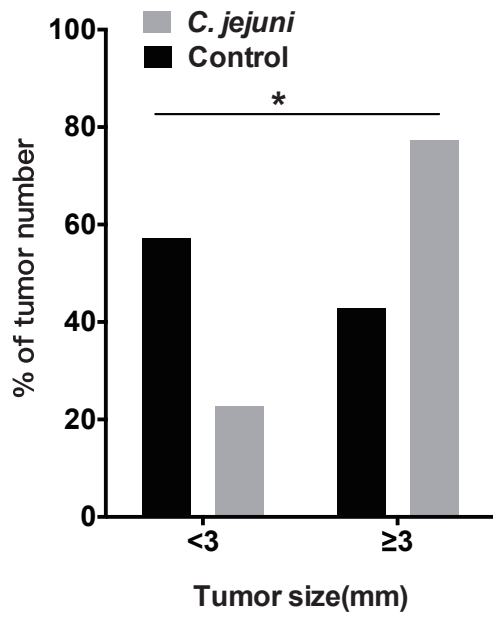

B

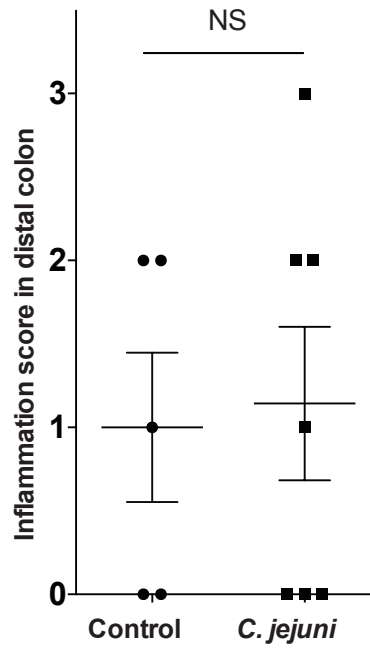

Supplemental Figure 4

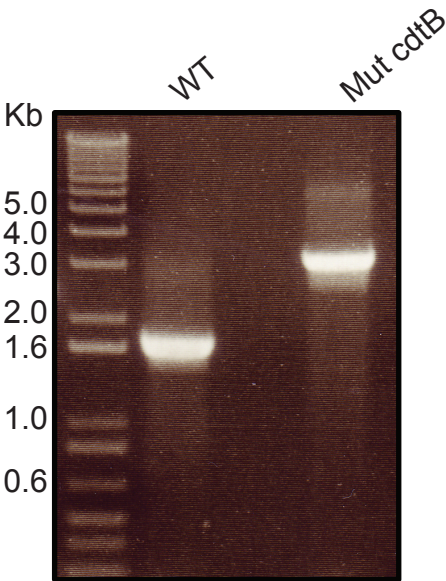



Supplemental Figure 5

A

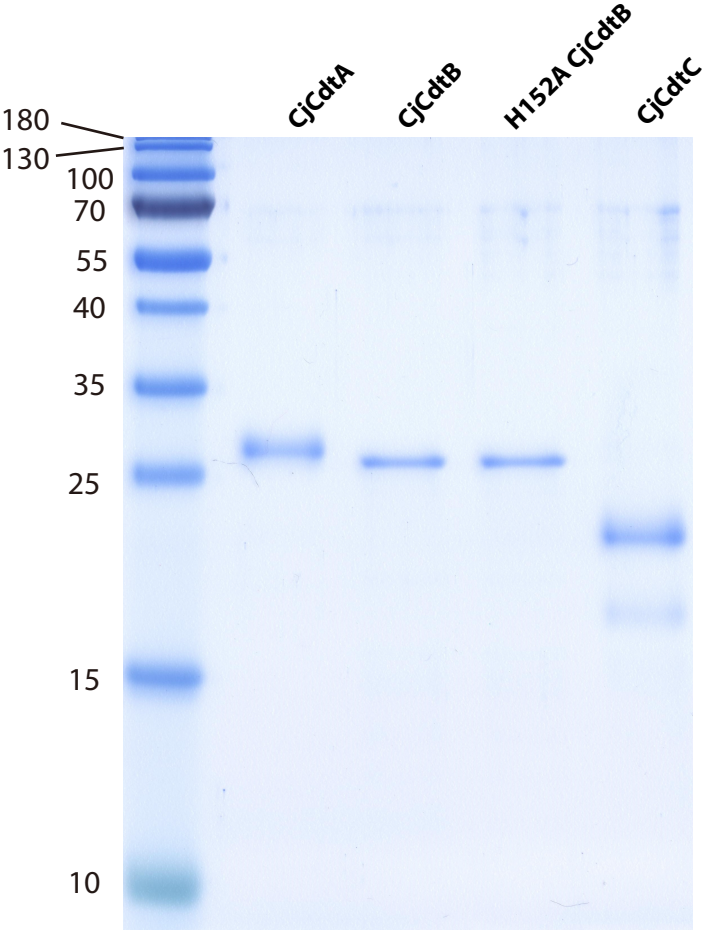

B

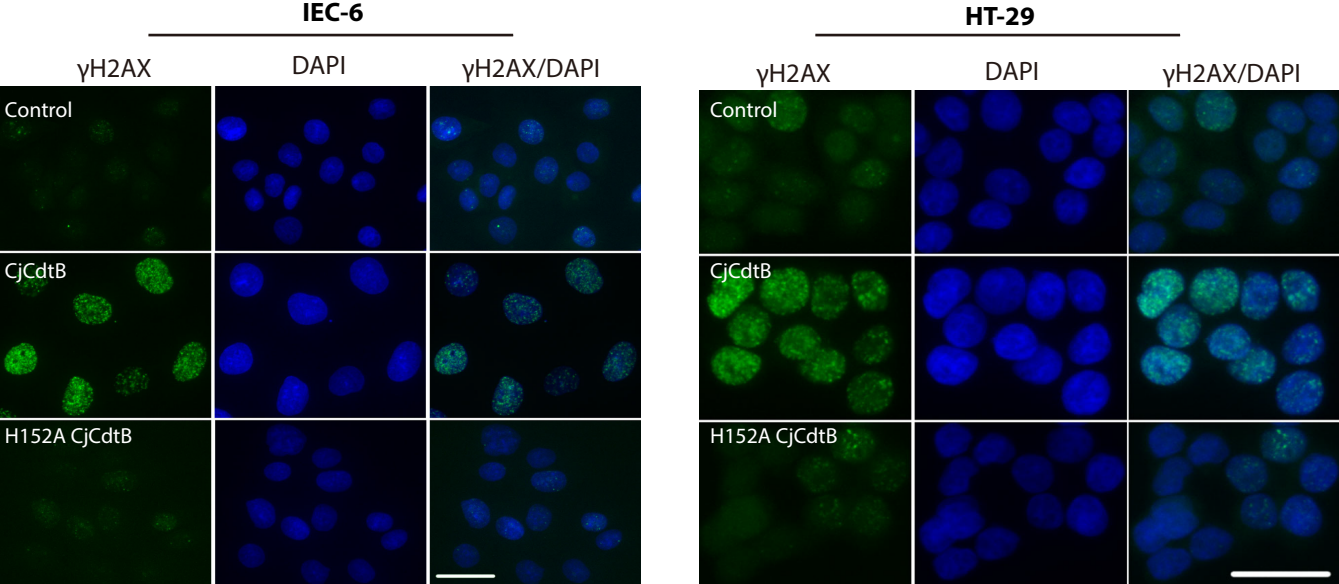

Supplemental Figure 6

A

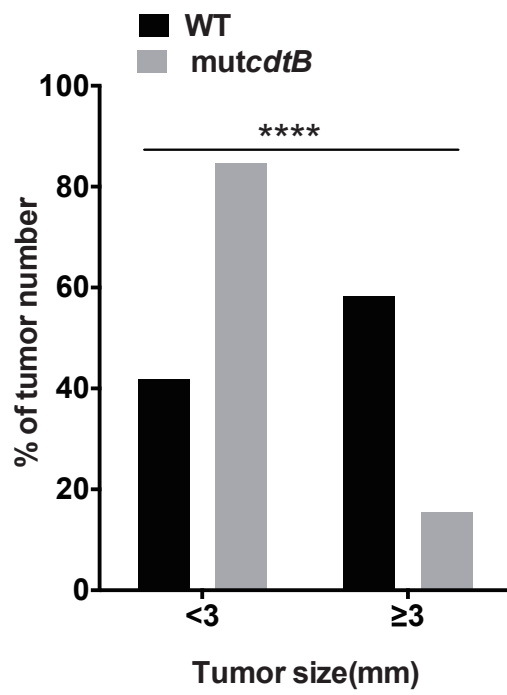

B

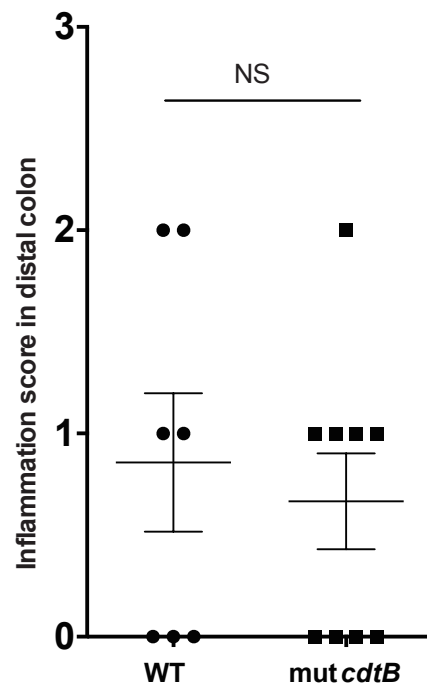





## Supplemental Figure 9

**A**

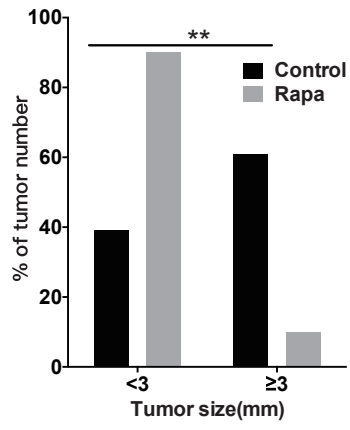

**B**

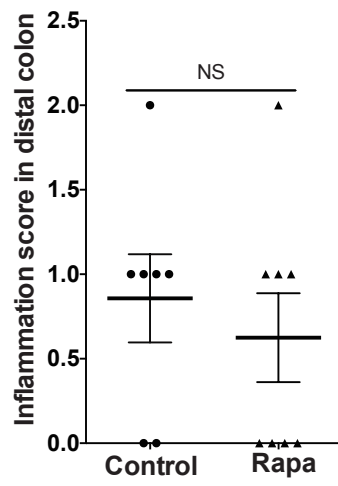

Supplement: gutjnl-2018-317200supp001.pdf [file gutjnl-2018-317200supp001.pdf]
