# Supplementary material for: Campylobacter jejuni promotes colorectal tumorigenesis through the action of cytolethal distending toxin
Source: PubMed Central journal article supplement — Gut. 2018 Oct 30;68(2):289–300. doi: 10.1136/gutjnl-2018-317200 (PMC6352414; doi:10.1136/gutjnl-2018-317200), 2018-10-30
Supplement: gutjnl-2018-317200supp002.pdf [file gutjnl-2018-317200supp002.pdf]

| Gene name | Full name                                  | logFC(Cj/ <i>cdtB</i> ) | <i>P</i> value | FDR-adjusted <i>P</i> value |
|-----------|--------------------------------------------|-------------------------|----------------|-----------------------------|
| Cyp2c55   | Cytochrome P450, E-class, group IV         | -4.352596081            | 3.58E-05       | 0.034014609                 |
| Igkv8-27  | Immunoglobulin V-set, subgroup             | -3.703436433            | 1.65E-09       | 1.17E-05                    |
| Ighv1-39  | Immunoglobulin V-set, subgroup             | -3.099652692            | 6.55E-05       | 0.044473337                 |
| Ighv1-81  | Immunoglobulin V-set, subgroup             | -2.989386782            | 3.85E-05       | 0.034230521                 |
| Clca3     | Calcium-activated chloride channel protein | -2.745674856            | 1.43E-09       | 1.17E-05                    |
| Tppp      | P25-alpha                                  | -2.641327135            | 1.81E-05       | 0.019866802                 |
| Tgm3      | Transglutaminase-like                      | -2.174012681            | 8.92E-06       | 0.011354382                 |
| Gbp4      | Guanylate-binding protein, N-terminal      | 1.842467365             | 7.71E-05       | 0.049899936                 |
| Cxcl1     | Chemokine interleukin-8-like domain        | 2.167234582             | 6.56E-05       | 0.044473337                 |
| ligp1     | Interferon-inducible GTPase                | 2.172904899             | 9.57E-06       | 0.011354382                 |
| Tgtp2     | Interferon-inducible GTPase                | 2.483891626             | 4.83E-05       | 0.040424753                 |
| Ighv8-12  | Immunoglobulin V-set, subgroup             | 2.773032047             | 1.37E-06       | 0.002579088                 |
| Ighv7-3   | Immunoglobulin V-set, subgroup             | 2.8705062               | 2.64E-05       | 0.026803517                 |
| Fpr2      | DEZ orphan receptor                        | 2.962080935             | 7.49E-07       | 0.001777483                 |
| Igkv10-94 | Immunoglobulin V-set, subgroup             | 3.029142758             | 6.10E-06       | 0.009657075                 |
| Ighv6-3   | Immunoglobulin V-set, subgroup             | 3.043682189             | 2.82E-07       | 0.000801785                 |
| Cxcl9     | CXC chemokine                              | 3.051739078             | 8.13E-06       | 0.011354382                 |
| Tgtp1     | ArgK protein                               | 3.322237458             | 2.36E-07       | 0.000801785                 |
| Igkv1-110 | Immunoglobulin V-set, subgroup             | 3.474285827             | 1.81E-07       | 0.000801785                 |
| Ighv14-3  | Immunoglobulin V-set, subgroup             | 3.738194277             | 5.44E-05       | 0.043022218                 |
| Cxcl10    | CXC chemokine                              | 3.750589809             | 1.45E-06       | 0.002579088                 |
| Reg3g     | C-type lectin fold                         | 3.86147291              | 6.39E-05       | 0.044473337                 |
