# Supplementary material for: Campylobacter jejuni promotes colorectal tumorigenesis through the action of cytolethal distending toxin
Source: PubMed Central journal article supplement — Gut. 2018 Oct 30;68(2):289–300. doi: 10.1136/gutjnl-2018-317200 (PMC6352414; doi:10.1136/gutjnl-2018-317200), 2018-10-30
Supplement: gutjnl-2018-317200supp003.pdf [file gutjnl-2018-317200supp003.pdf]

| Column1    | P value     | FDR-adjusted P | Cdtb mutant WT Cj | taxonomy                                                                                                       |
|------------|-------------|----------------|-------------------|----------------------------------------------------------------------------------------------------------------|
| OTU_199403 | 0.00091005  | 0.003103502    | 0                 | 2.39321013 p_Actinobacteria;c_Coriobacteria;o_Coriobacteriales;f_Coriobacteriaceae;g_Adlercreutzia;s_          |
| OTU_23151C | 0.001517886 | 0.005046972    | 0                 | 2.03396985 p_Actinobacteria;c_Coriobacteria;o_Coriobacteriales;f_Coriobacteriaceae;g_Adlercreutzia;s_          |
| OTU_267045 | 5.78876E-05 | 0.000493133    | 0                 | 2.85983888 p_Bacteroidetes;c_Bacteroidia;o_Bacteroidales;f_Bacteroidaceae;g_Bacteroides;NA                     |
| OTU_26041C | 1.34497E-05 | 0.000357761    | 0                 | 3.41202701 p_Bacteroidetes;c_Bacteroidia;o_Bacteroidales;f_Bacteroidaceae;g_Bacteroides;s_                     |
| OTU_339545 | 1.03747E-05 | 0.000357761    | 0                 | 3.4527608 p_Bacteroidetes;c_Bacteroidia;o_Bacteroidales;f_S24-7;g_;                                            |
| OTU_373445 | 9.69899E-06 | 0.000357761    | 0                 | 1.99407628 p_Bacteroidetes;c_Bacteroidia;o_Bacteroidales;f_S24-7;g_;                                           |
| OTU_384555 | 1.29112E-05 | 0.000357761    | 0                 | 3.39200171 p_Bacteroidetes;c_Bacteroidia;o_Bacteroidales;f_S24-7;g_;                                           |
| OTU_416043 | 7.3578E-06  | 0.000357761    | 0                 | 2.9393717 p_Bacteroidetes;c_Bacteroidia;o_Bacteroidales;f_S24-7;g_;                                            |
| OTU_208405 | 4.25033E-05 | 0.000493133    | 0                 | 2.2857908 p_Bacteroidetes;c_Bacteroidia;o_Bacteroidales;f_S24-7;g_;                                            |
| OTU_22125C | 4.93644E-05 | 0.000493133    | 0                 | 2.08264063 p_Bacteroidetes;c_Bacteroidia;o_Bacteroidales;f_S24-7;g_;                                           |
| OTU_264534 | 5.83715E-05 | 0.000493133    | 0                 | 1.25028225 p_Bacteroidetes;c_Bacteroidia;o_Bacteroidales;f_S24-7;g_;                                           |
| OTU_277364 | 3.40054E-05 | 0.000493133    | 0                 | 2.57982423 p_Bacteroidetes;c_Bacteroidia;o_Bacteroidales;f_S24-7;g_;                                           |
| OTU_303491 | 3.40401E-05 | 0.000493133    | 0                 | 2.51702791 p_Bacteroidetes;c_Bacteroidia;o_Bacteroidales;f_S24-7;g_;                                           |
| OTU_41607E | 5.8489E-05  | 0.000493133    | 0                 | 2.22118988 p_Bacteroidetes;c_Bacteroidia;o_Bacteroidales;f_S24-7;g_;                                           |
| OTU_430194 | 2.82907E-05 | 0.000493133    | 0                 | 3.84491742 p_Bacteroidetes;c_Bacteroidia;o_Bacteroidales;f_S24-7;g_;                                           |
| OTU_445144 | 3.73341E-05 | 0.000493133    | 0                 | 2.81643745 p_Bacteroidetes;c_Bacteroidia;o_Bacteroidales;f_S24-7;g_;                                           |
| OTU_324013 | 6.71404E-05 | 0.000525275    | 0                 | 2.19996912 p_Bacteroidetes;c_Bacteroidia;o_Bacteroidales;f_S24-7;g_;                                           |
| OTU_35622E | 8.28648E-05 | 0.000551051    | 0                 | 2.4167719 p_Bacteroidetes;c_Bacteroidia;o_Bacteroidales;f_S24-7;g_;                                            |
| OTU_386977 | 7.72045E-05 | 0.000551051    | 0                 | 2.15476019 p_Bacteroidetes;c_Bacteroidia;o_Bacteroidales;f_S24-7;g_;                                           |
| OTU_206324 | 0.000101671 | 0.000643917    | 0                 | 1.49802952 p_Bacteroidetes;c_Bacteroidia;o_Bacteroidales;f_S24-7;g_;                                           |
| OTU_270984 | 0.000152582 | 0.000922259    | 0                 | 2.31781917 p_Bacteroidetes;c_Bacteroidia;o_Bacteroidales;f_S24-7;g_;                                           |
| OTU_35574E | 0.000180291 | 0.000922259    | 0                 | 2.14755691 p_Bacteroidetes;c_Bacteroidia;o_Bacteroidales;f_S24-7;g_;                                           |
| OTU_134762 | 0.000505187 | 0.002192799    | 0                 | 1.82336105 p_Bacteroidetes;c_Bacteroidia;o_Bacteroidales;f_S24-7;g_;                                           |
| OTU_26697E | 0.000543425 | 0.002192799    | 0                 | 2.74167557 p_Bacteroidetes;c_Bacteroidia;o_Bacteroidales;f_S24-7;g_;                                           |
| OTU_340873 | 0.000673363 | 0.002558778    | 0                 | 2.43337399 p_Bacteroidetes;c_Bacteroidia;o_Bacteroidales;f_S24-7;g_;                                           |
| OTU_33172C | 0.000790394 | 0.002831619    | 0                 | 1.24944319 p_Bacteroidetes;c_Bacteroidia;o_Bacteroidales;f_S24-7;g_;                                           |
| OTU_206633 | 0.001980248 | 0.00598575     | 0                 | 1.77893848 p_Bacteroidetes;c_Bacteroidia;o_Bacteroidales;f_S24-7;g_;                                           |
| OTU_344085 | 0.003102332 | 0.00877894     | 0                 | 1.55076107 p_Bacteroidetes;c_Bacteroidia;o_Bacteroidales;f_S24-7;g_;                                           |
| OTU_269902 | 0.010793278 | 0.0239251      | 0                 | 2.60524064 p_Bacteroidetes;c_Bacteroidia;o_Bacteroidales;f_S24-7;g_;                                           |
| OTU_19741C | 0.015359704 | 0.031428317    | 0                 | 2.16181005 p_Bacteroidetes;c_Bacteroidia;o_Bacteroidales;f_S24-7;g_;                                           |
| OTU_363924 | 8.1077E-05  | 0.000551051    | 0                 | 1.77832769 p_Firmicutes;c_Bacilli;o_Lactobacillales;f_Enterococcaceae;g_;                                      |
| OTU_335504 | 2.01522E-05 | 0.000446708    | 0                 | 2.41688087 p_Firmicutes;c_Bacilli;o_Lactobacillales;f_Enterococcaceae;g_Enterococcus;NA                        |
| OTU_463794 | 0.00024876  | 0.001223353    | 0                 | 3.94437537 p_Firmicutes;c_Bacilli;o_Lactobacillales;f_Lactobacillaceae;g_Lactobacillus;_                       |
| OTU_182758 | 0.00058569  | 0.002291081    | 0                 | 2.00417687 p_Firmicutes;c_Bacilli;o_Lactobacillales;f_Lactobacillaceae;g_Lactobacillus;s_                      |
| OTU_110702 | 0.00080853  | 0.002831619    | 0                 | 1.79968729 p_Firmicutes;c_Bacilli;o_Lactobacillales;f_Lactobacillaceae;g_Lactobacillus;s_                      |
| OTU_259111 | 0.001893724 | 0.005857331    | 0                 | 1.90403024 p_Firmicutes;c_Bacilli;o_Lactobacillales;f_Lactobacillaceae;g_Lactobacillus;s_                      |
| OTU_318764 | 0.002102407 | 0.00621378     | 0                 | 2.99855037 p_Firmicutes;c_Bacilli;o_Lactobacillales;f_Lactobacillaceae;g_Turicibacter;s_                       |
| OTU_452823 | 0.014121945 | 0.029812994    | 0                 | 1.25966949 p_Firmicutes;c_Bacilli;o_Lactobacillales;f_Lactobacillaceae;g_Lactobacillus;s_                      |
| OTU_36849C | 0.012812166 | 0.027484163    | 2.35149547        | 0.46377964 p_Firmicutes;c_Bacilli;o_Turicibacterales;f_Turicibacteraceae;g_Turicibacter;s_                     |
| OTU_214915 | 0.021756365 | 0.04255289     | 4.59741849        | 2.69618321 p_Firmicutes;c_Bacilli;o_Turicibacterales;f_Turicibacteraceae;g_Turicibacter;s_                     |
| OTU_341322 | 0.025276584 | 0.04802551     | 0.84021136        | 0 p_Firmicutes;c_Bacilli;o_Turicibacterales;f_Turicibacteraceae;g_Turicibacter;s_                              |
| OTU_233817 | 0.000809034 | 0.002831619    | 0                 | 2.1002549 p_Firmicutes;c_Clostridia;o_Clostridiales;f_;                                                        |
| OTU_354957 | 0.001710658 | 0.005549206    | 0                 | 2.82884907 p_Firmicutes;c_Clostridia;o_Clostridiales;f_;                                                       |
| OTU_659831 | 0.00597571  | 0.015583713    | 0                 | 2.67041923 p_Firmicutes;c_Clostridia;o_Clostridiales;f_;                                                       |
| OTU_33627E | 0.007368024 | 0.014889571    | 0                 | 1.40522547 p_Firmicutes;c_Clostridia;o_Clostridiales;f_;                                                       |
| OTU_274521 | 0.008859046 | 0.020671107    | 0                 | 2.16423939 p_Firmicutes;c_Clostridia;o_Clostridiales;f_;                                                       |
| OTU_347166 | 0.010757827 | 0.0239251      | 0                 | 2.01789499 p_Firmicutes;c_Clostridia;o_Clostridiales;f_;                                                       |
| OTU_25991C | 0.012142995 | 0.02647571     | 0                 | 2.17415917 p_Firmicutes;c_Clostridia;o_Clostridiales;f_;                                                       |
| OTU_321353 | 0.026306528 | 0.049278426    | 0                 | 2.34555827 p_Firmicutes;c_Clostridia;o_Clostridiales;f_;                                                       |
| OTU_351357 | 0.01873073  | 0.037181897    | 0                 | 1.39559733 p_Firmicutes;c_Clostridia;o_Clostridiales;f_Clostridiaceae;g_SMB53;s_                               |
| OTU_326865 | 0.004934057 | 0.013671448    | 2.47892057        | 1.25966949 p_Firmicutes;c_Clostridia;o_Clostridiales;f_Lachnospiraceae;g_Blautia;s_producta                    |
| OTU_369153 | 0.005261953 | 0.014282443    | 1.1109918         | 0.30448782 p_Firmicutes;c_Clostridia;o_Clostridiales;f_Lachnospiraceae;g_Blautia;s_producta                    |
| OTU_550013 | 0.005620521 | 0.014950587    | 3.49613479        | 2.28311654 p_Firmicutes;c_Clostridia;o_Clostridiales;f_Lachnospiraceae;g_Blautia;s_producta                    |
| OTU_554338 | 0.007519286 | 0.018519722    | 2.79208277        | 1.59311777 p_Firmicutes;c_Clostridia;o_Clostridiales;f_Lachnospiraceae;g_Blautia;s_producta                    |
| OTU_696563 | 0.007817356 | 0.018903788    | 1.71602984        | 0.59270783 p_Firmicutes;c_Clostridia;o_Clostridiales;f_Lachnospiraceae;g_Blautia;s_producta                    |
| OTU_84259E | 0.00831108  | 0.019738814    | 0.95825171        | 0.2402648 p_Firmicutes;c_Clostridia;o_Clostridiales;f_Lachnospiraceae;g_Blautia;s_producta                     |
| OTU_195336 | 0.009038721 | 0.020726722    | 2.24082839        | 0.91839528 p_Firmicutes;c_Clostridia;o_Clostridiales;f_Lachnospiraceae;g_Blautia;s_producta                    |
| OTU_587265 | 0.014900376 | 0.030964844    | 1.23257079        | 0.39405248 p_Firmicutes;c_Clostridia;o_Clostridiales;f_Lachnospiraceae;g_Blautia;s_producta                    |
| OTU_110532 | 0.024566899 | 0.047353588    | 1.14927835        | 0.41488354 p_Firmicutes;c_Clostridia;o_Clostridiales;f_Lachnospiraceae;g_Blautia;s_producta                    |
| OTU_27140E | 0.000544078 | 0.002192799    | 0                 | 2.88623215 p_Firmicutes;c_Clostridia;o_Clostridiales;f_Lachnospiraceae;g_Dorea;s_                              |
| OTU_33584E | 0.001831384 | 0.005799383    | 0                 | 1.80194561 p_Firmicutes;c_Clostridia;o_Clostridiales;f_Lachnospiraceae;g_Dorea;s_                              |
| OTU_318231 | 0.016003114 | 0.0322487      | 0                 | 2.59497093 p_Firmicutes;c_Clostridia;o_Clostridiales;f_Lachnospiraceae;NA;NA                                   |
| OTU_311961 | 0.00017232  | 0.000922259    | 0                 | 1.95620154 p_Firmicutes;c_Clostridia;o_Clostridiales;f_Ruminococcaceae;g_Anaerotruncus;s_                      |
| OTU_260753 | 0.00017394  | 0.000922259    | 0                 | 1.83364056 p_Firmicutes;c_Clostridia;o_Clostridiales;f_Ruminococcaceae;g_Oscillospira;s_                       |
| OTU_23265E | 0.002913945 | 0.008425102    | 0                 | 2.07871242 p_Firmicutes;c_Clostridia;o_Clostridiales;f_Ruminococcaceae;g_Ruminococcus;s_                       |
| OTU_27346E | 5.93242E-05 | 0.000493133    | 0                 | 3.86895665 p_Firmicutes;c_Erysipelotrichi;o_Erysipelotrichales;f_Erysipelotrichaceae;g_Allobaculum;s_          |
| OTU_26232E | 0.000169843 | 0.000922259    | 0                 | 2.56119439 p_Firmicutes;c_Erysipelotrichi;o_Erysipelotrichales;f_Erysipelotrichaceae;g_Allobaculum;s_          |
| OTU_272334 | 0.000462995 | 0.002123393    | 0                 | 2.03691657 p_Firmicutes;c_Erysipelotrichi;o_Erysipelotrichales;f_Erysipelotrichaceae;g_Allobaculum;s_          |
| OTU_273997 | 0.00053362  | 0.002192799    | 0                 | 1.62926707 p_Firmicutes;c_Erysipelotrichi;o_Erysipelotrichales;f_Erysipelotrichaceae;g_Allobaculum;s_          |
| OTU_262095 | 0.000257548 | 0.001223353    | 0.17183698        | 3.25498185 p_Firmicutes;c_Erysipelotrichi;o_Erysipelotrichales;f_Erysipelotrichaceae;g_Clostridium;s_cocleatum |
